# Supplementary material for: Data-driven model predictive control for power demand management and fast demand response of commercial buildings using support vector regression
Source: Springer Nature journal article supplement (doi:10.1007/s12273-021-0811-x), 2021-06-30
Supplement: 12273_2021_811_MOESM1_ESM.pdf [file 12273_2021_811_MOESM1_ESM.pdf]

## Electronic Supplementary Material

# Data-driven model predictive control for power demand management and fast demand response of commercial buildings using support vector regression

Rui Tang<sup>1</sup>, Cheng Fan<sup>2,3</sup> (✉), Fanzhe Zeng<sup>4</sup>, Wei Feng<sup>5</sup>

1. Institute for Environmental Design and Engineering, University College London, London, UK

2. Key Laboratory for Resilient Infrastructures of Coastal Cities (Shenzhen University), Ministry of Education, China

3. Sino-Australia Joint Research Center in BIM and Smart Construction, Shenzhen University, Shenzhen, China

4. School of Municipal and Environmental Engineering, Shenyang Jianzhu University, Shenyang, China

5. China Energy Group, Lawrence Berkeley National Laboratory, Berkeley, CA, USA

Supporting information to <https://doi.org/10.1007/s12273-021-0811-x>

### Appendix

#### A. Development of the RC model for MPC

According to Figure 4 in the text, the heat exchanges and energy balances between outdoor, indoor and building envelop are presented in Eqs. (a1)–(a5) (Tang and Wang 2019).

$$C_{w,1} \frac{dT_{w,ex}}{dt} = \frac{T_{out} - T_{w,ex}}{R_{w,o}} - \frac{T_{w,ex} - T_{w,in}}{R_w} + Q_{solar,w} \quad (a1)$$

$$C_{w,2} \frac{dT_{w,in}}{dt} = \frac{T_{w,ex} - T_{w,in}}{R_w} - \frac{T_{w,in} - T_{in}}{R_{w,i}} \quad (a2)$$

$$C_{im,1} \frac{dT_{im,1}}{dt} = \frac{T_{im,2} - T_{im,1}}{R_{i,1}} + Q_{im,1} \quad (a3)$$

$$C_{im,2} \frac{dT_{im,2}}{dt} = \frac{T_{im,1} - T_{im,2}}{R_{i,1}} - \frac{T_{im,2} - T_{in}}{R_{i,2}} + Q_{im,2} \quad (a4)$$

$$C_{in} \frac{dT_{in}}{dt} = \frac{T_{im,2} - T_{in}}{R_{i,2}} + \frac{T_{w,in} - T_{in}}{R_{w,i}} + \frac{T_{out} - T_{in}}{R_{win}} + Q_{inter,i} - Q_{ac} + Q_{solar,i} \quad (a5)$$

where, the values of  $R$  and  $C$  are determined by training historical data by genetic algorithm.  $T$  is the temperature. Indoor air, outdoor air, exterior wall, internal wall surface, external wall surface, window, and internal mass are represented by the subscripts of  $i$ ,  $out$ ,  $w$ ,  $in$ ,  $ex$ ,  $win$  and  $im$ , respectively.  $Q_{solar}$  is the solar heat gain.  $Q_{inter,i}$  is internal heat gain.  $Q_{im}$  is the radiation heat.  $Q_{ac}$  is the cooling demand provided by the central air-conditioning systems (i.e.,  $Q_{dem}$ ), which is determined by the chiller power demand ( $P_{ch}$ ) and corresponding  $COP$  (coefficient of performance), as shown in Eq. (a11).

$$Q_{solar,w} = \alpha I_{solar} \quad (a6)$$

$$Q_{solar,i} = \beta_i \cdot SHGC \cdot I_{solar} \quad (a7)$$

$$Q_{im,1} = Q_{im,2} = b \cdot (Q_{solar,im} + Q_{inter,im}) \quad (a8)$$

$$Q_{solar,im} = \beta_{im} \cdot SHGC \cdot I_{solar} \quad (a9)$$

$$Q_{inter,im} = \mu \cdot Q_{inter} \quad (a10)$$

$$Q_{dem} = P_{ch} \cdot COP \quad (a11)$$

where,  $I_{solar}$  is the global solar radiation, obtained from weather data;  $\beta$ ,  $b$ , and  $\mu$  represent the pre-set ratios of split radiative/convective heat gain;  $\alpha$  denotes the absorptance of the surface of solar radiation.  $SHGC$  is solar heat gain coefficient.

The RC model is reformatted as a linear continuous-time state-space model in Eq. (a12), where system state vector  $\mathbf{x} = [T_{w,ex} \ T_{w,in} \ T_{im,1} \ T_{im,2} \ T_{in}]^T$ . Control input vector  $\mathbf{u} = [P_{ch}]^T$ . Disturbance vector  $\mathbf{d} = [I_{solar} \ T_{out} \ Q_{inter}]^T$ . For online control, the continuous-time state-space model needs to be converted into the discrete-time state-space model (i.e., Eqs.(18)–(19)) based on the sampling time.

$$\frac{dx}{dt} = \mathbf{a} \cdot \mathbf{x} + \mathbf{b} \cdot \mathbf{u} + \mathbf{e} \cdot \mathbf{d} \quad (a12)$$

System matrix  $\mathbf{a}$ :

$$\mathbf{a} = \begin{bmatrix} \frac{-1}{C_{w,1}R_{w,o}} + \frac{-1}{C_{w,1}R_w} & \frac{1}{C_{w,1}R_w} & 0 & 0 & 0 \\ \frac{1}{C_{w,2}R_w} & \frac{-1}{C_{w,2}R_w} + \frac{-1}{C_{w,2}R_{w,i}} & 0 & 0 & \frac{1}{C_{w,2}R_{w,i}} \\ 0 & 0 & \frac{-1}{C_{im,1}R_{i,1}} & \frac{1}{C_{im,1}R_{i,1}} & 0 \\ 0 & 0 & \frac{1}{C_{im,2}R_{i,1}} & \frac{-1}{C_{im,2}R_{i,1}} + \frac{-1}{C_{im,2}R_{i,2}} & \frac{1}{C_{im,2}R_{i,2}} \\ 0 & \frac{1}{C_{in}R_{w,i}} & 0 & \frac{1}{C_{in}R_{i,2}} & \frac{-1}{C_{in}R_{i,2}} + \frac{-1}{C_{in}R_{w,i}} + \frac{-1}{C_{in}R_{win}} \end{bmatrix}_{5 \times 5}$$

$$\text{Input matrix } \mathbf{b}: \mathbf{b} = \begin{bmatrix} 0 \\ 0 \\ 0 \\ 0 \\ \frac{-COP}{C_{in}} \end{bmatrix}_{5 \times 1}$$

$$\text{Disturbance matrix } \mathbf{e}: \mathbf{e} = \begin{bmatrix} \frac{a}{C_{w,1}} & \frac{1}{C_{w,1}R_{w,o}} & 0 \\ 0 & 0 & 0 \\ \frac{b\beta_{im}SHGC}{C_{im,1}} & 0 & \frac{b}{C_{im,1}} \\ \frac{b\beta_{im}SHGC}{C_{im,2}} & 0 & \frac{b}{C_{im,2}} \\ \frac{\beta_i SHGC}{C_{in}} & \frac{1}{C_{in}R_{win}} & \frac{1}{C_{in}} \end{bmatrix}_{5 \times 3}$$

## B. Parameters of the discrete-time state-space model for MPC

$$\text{Matrix } A_d = \begin{bmatrix} 9.998 \times 10^{-1} & 1.093 \times 10^{-5} & 0 & 0 & 0 \\ 1.009 \times 10^{-5} & 9.989 \times 10^{-1} & 0 & 0 & 6.948 \times 10^{-7} \\ 0 & 0 & 9.958 \times 10^{-1} & 4.191 \times 10^{-3} & 0 \\ 0 & 0 & 3.796 \times 10^{-3} & 9.955 \times 10^{-1} & 2.571 \times 10^{-6} \\ 0 & 5.789 \times 10^{-1} & 0 & 2.084 \times 10^{-1} & 9.403 \times 10^{-7} \end{bmatrix}_{5 \times 5}$$

$$\text{Matrix } B_d: B_d = \begin{bmatrix} 0 \\ 0 \\ 0 \\ 0 \\ -1.003 \times 10^{-2} \end{bmatrix}_{5 \times 1}$$

$$\text{Matrix } E_d: E_d = \begin{bmatrix} 7.800 \times 10^{-7} & 1.034 \times 10^{-5} & 0 \\ 0 & 0 & 0 \\ 1.788 \times 10^{-6} & 0 & 2.555 \times 10^{-6} \\ 2.293 \times 10^{-6} & 0 & 3.276 \times 10^{-6} \\ 7.808 \times 10^{-4} & 2.119 \times 10^{-1} & 1.115 \times 10^{-3} \end{bmatrix}_{5 \times 3}$$

$$\text{Matrix } C_d: C_d = [0 \ 0 \ 0 \ 0 \ 1]_{1 \times 5}$$

## Reference

Tang R, Wang S (2019). Model predictive control for thermal energy storage and thermal comfort optimization of building demand response in smart grids. *Applied Energy*, 242: 873–882.
